# Supplementary material for: A PEGylated alternating copolymeric prodrug of sulfur dioxide with glutathione responsiveness for Irinotecan delivery
Source: Royal Society of Chemistry journal article supplement (doi:10.1039/d0tb02097d), 2020-11-16
Supplement: d0tb02097d1.pdf [file d0tb02097d1.pdf]

## Supporting information

### PEGylated alternating copolymeric prodrug of sulfur dioxide with glutathione responsiveness for Irinotecan delivery

Yu Zhang,<sup>a</sup> Hongyu Zhang,<sup>a</sup> Pan He,<sup>b\*</sup> Xuan Yi,<sup>a,c</sup> Xinming Liu,<sup>a</sup> Chunsheng Xiao,<sup>a,c\*</sup>

a. Key Laboratory of Polymer Ecomaterials, Changchun Institute of Applied Chemistry, Chinese Academy of Sciences, Changchun 130022, P. R. China

b. School of Materials Science and Engineering, Changchun University of Science and Technology, Changchun 130022, P. R. China

c. Jilin Biomedical Polymers Engineering Laboratory, Changchun, 130022, P. R. China

Corresponding authors:

1. Pan He (P. He) E-mail: [hpan@cust.edu.cn](mailto:hpan@cust.edu.cn)

Tel: +86-431-85583188; Fax: +86-431-85583188

2. Chunsheng Xiao (C. Xiao) E-mail: [xiaocs@ciac.ac.cn](mailto:xiaocs@ciac.ac.cn)

Tel: +86-431-85262116; Fax: +86-431-85262116

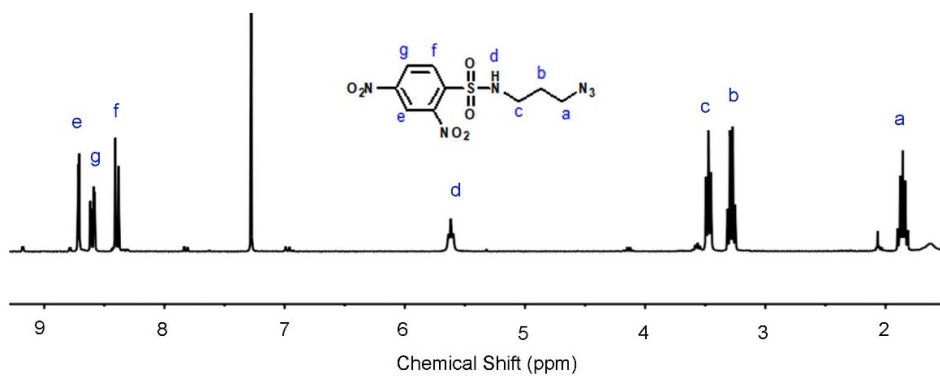

**Fig. S1.**  $^1\text{H}$  NMR spectrum of *N*-(3-azidopropyl)-2,4-dinitrobenzenesulfonamide (AP-DNs) in  $\text{CDCl}_3$ .

(A)

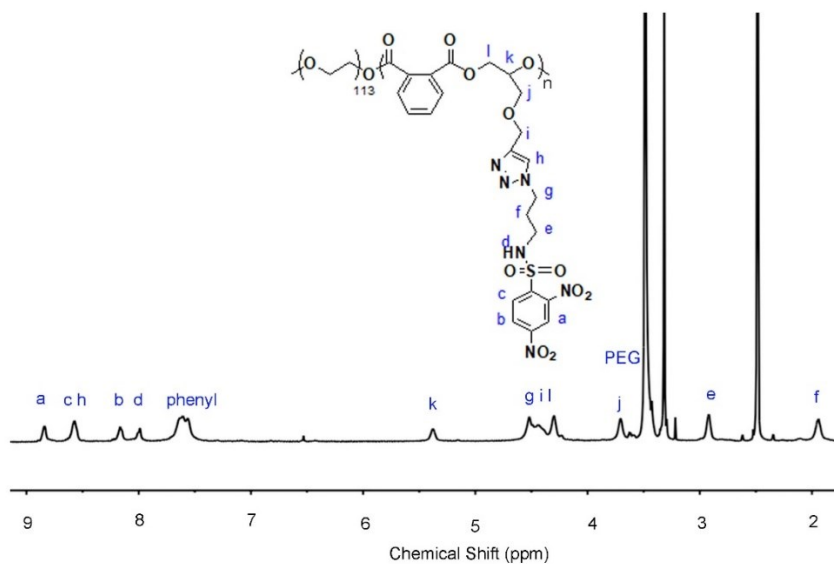

(B)

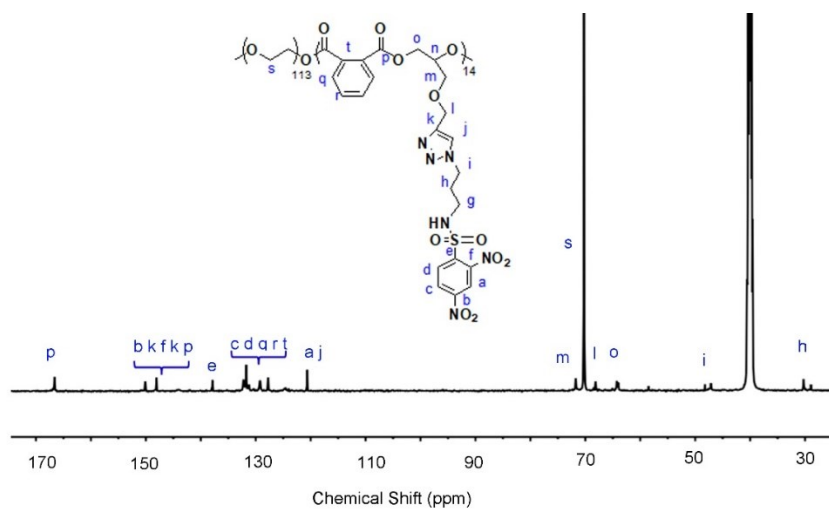

**Fig. S2.**  $^1\text{H}$  (A) and  $^{13}\text{C}$  (B) NMR spectrum of mPEG-*b*-P(PA-*alt*-GDNs) in  $\text{DMSO-}d_6$ .

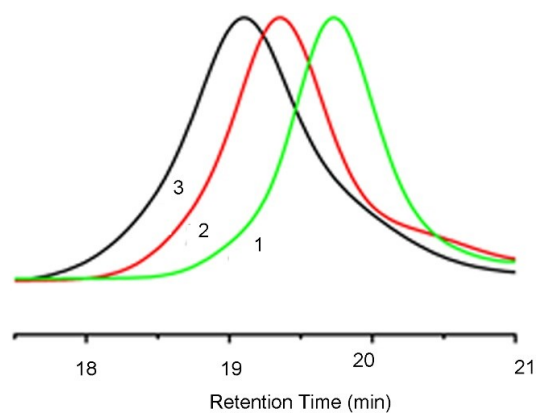

**Fig. S3.** GPC profiles of mPEG (1), mPEG-*b*-P(PA-*alt*-GPE) (2) and mPEG-*b*-P(PA-*alt*-GDNs) (3).

**Table S1.** GPC results of mPEG, mPEG-*b*-P(PA-*alt*-GPE) and mPEG-*b*-P(PA-*alt*-GDNs).

|   | <b>Polymers</b>                        | $M_n$ | $\bar{D}$ |
|---|----------------------------------------|-------|-----------|
| 1 | mPEG                                   | 12500 | 1.16      |
| 2 | mPEG- <i>b</i> -P(PA- <i>alt</i> -GPE) | 20900 | 1.27      |
| 3 | mPEG- <i>b</i> -P(PA- <i>alt</i> -DNs) | 27000 | 1.33      |

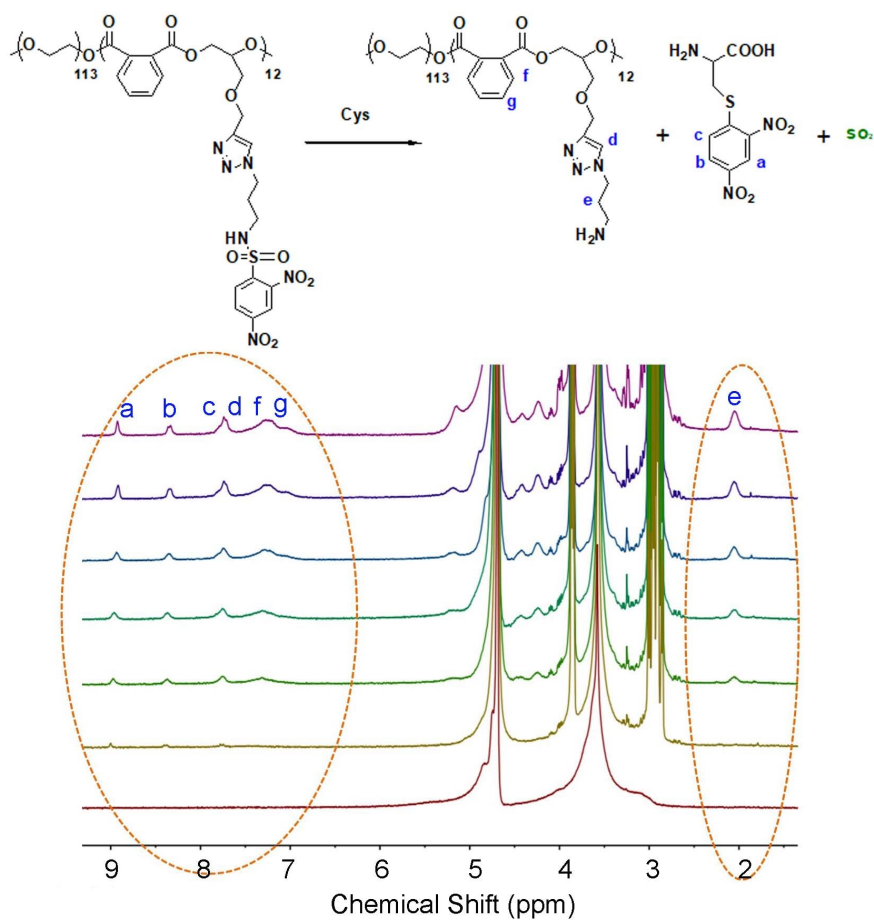

**Fig. S4.** In situ time-varied <sup>1</sup>H NMR spectra of mPEG-*b*-P(PA-*alt*-GDNs) micelles in the presence of cysteine at room temperature.

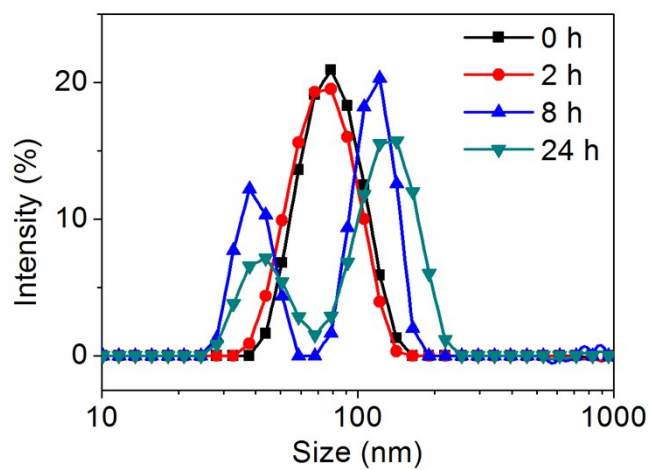

**Fig. S5.** The DLS profiles of NPs (0.02 mg/mL) after treatment with 5 mM GSH.

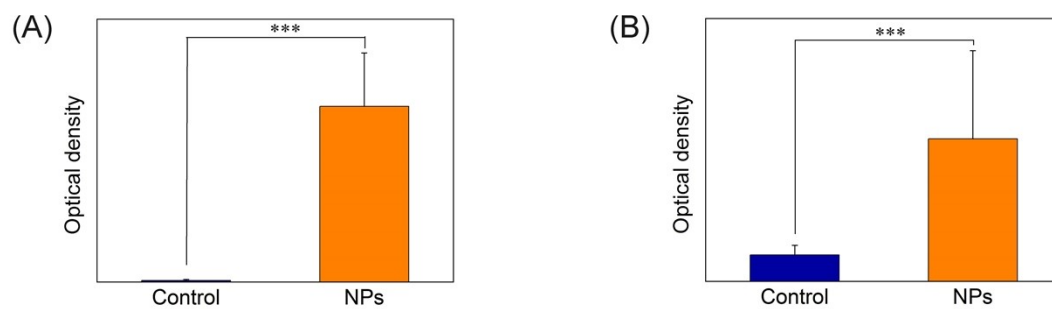

**Fig. S6.** (A) and (B) are the relative optical densities in HepG2 cells based on the CLSM results in Figure 6A and 6B, respectively.  $***p < 0.001$ .
